## Hemoglobin level at stabilization is associated with long-term all-cause mortality in patients with left-sided endocarditis, a POET substudy

M. Pries-Heje<sup>1</sup>, R.B. Hasselbalch<sup>2</sup>, N. Ihleman<sup>1</sup>, S. Gill<sup>3</sup>, N.E. Bruun<sup>4</sup>, H. Elming<sup>4</sup>, K. Jensen<sup>5</sup>, L. Oestergaard<sup>1</sup>, J. Helweg-Larsen<sup>6</sup>, E.L. Fosboel<sup>1</sup>, L. Koeber<sup>1</sup>, N. Toender<sup>7</sup>, C. Moser<sup>8</sup>, K. Iversen<sup>1</sup>, H. Bundgaard<sup>1</sup>

<sup>1</sup>Rigshospitalet - Copenhagen University Hospital, Department of Cardiology, Copenhagen, Denmark; <sup>2</sup>Herlev Hospital, Emergency Department, Herlev, Denmark; <sup>3</sup>Odense University Hospital, Department of Cardiology, Odense, Denmark; <sup>4</sup>Zealand University Hospital, Department of Cardiology, Roskilde, Denmark; <sup>5</sup>Aarhus University Hospital, Department of Cardiology, Aarhus, Denmark; <sup>6</sup>Rigshospitalet - Copenhagen University Hospital, Department of Infectious Diseases, Copenhagen, Denmark; <sup>7</sup>Hillerod Hospital, Department of Cardiology, Hillerod, Denmark; <sup>8</sup>Rigshospitalet - Copenhagen University Hospital, Department of Clinical Microbiology, Copenhagen, Denmark

On behalf of POET

**Funding Acknowledgement:** Type of funding source: Foundation. Main funding source(s): The Danish Heart Foundation, The Capital Regions Research Council

**Background:** Left-sided infectious endocarditis (IE) has a high 1-year mortality. Anemia is a common finding in patients with IE, yet little is known about frequency, severity, and associated outcomes in this setting.

**Purpose:** To examine the relationship between Hemoglobin (Hgb) level measured at IE stabilization (time of randomization) in the Partial Oral versus intravenous Antibiotic Treatment of Endocarditis (POET) trial - and long-term all-cause mortality.

**Methods:** In the POET trial, 400 patients with left-sided IE were randomized, after medical and/or surgical stabilization, to conventional antibiotic treatment or partial oral treatment. Only non-surgically treated patients were considered in this study. Patients were divided by quartiles into four groups based on Hgb level at randomization.

**Results:** We examined 248 patients with non-surgically treated IE. Median time from diagnosis of IE to randomization was 14 days (IQ 12–19). At long-term follow-up (median 3.2 years, IQ 2.18–4.60), 71 patients had died (28.6%). Patients in the lowest quartile (Hgb  $\leq$ 6.0 mmol) had a HR of 4.17 (95% CI 1.81–9.61,  $p < 0.001$ ) for death compared to patients in the highest quartile (Hgb  $>$ 7.5 mmol/L). This association remained significant after multivariable adjustment for age, sex, renal disease, C-Reactive Protein, and Prosthetic heart valve (HR 2.69, 95% CI 1.11–6.50);  $p = 0.028$ ).

**Conclusion:** Low Hemoglobin level at stabilization in patients with IE was associated with an increased risk of long-term mortality. Whether intensified treatment of anemia in patients with IE could improve long-term outcome requires investigation.

Table. Baseline Characteristics

|                                         | All (n=248)     | Hgb $\leq$ 6.0* (n=65) | Hgb 6.1–6.7* (n=63) | Hgb 6.8–7.5* (n=61) | Hgb $>$ 7.5* (n=59) | p value |
|-----------------------------------------|-----------------|------------------------|---------------------|---------------------|---------------------|---------|
| Male, n (%)                             | 186 (75.0)      | 43 (66.2)              | 46 (73.0)           | 46 (75.4)           | 51 (86.4)           | 0.024   |
| Age, years – mean (n)                   | 70.6 (11.1)     | 70.9 (11.1)            | 71.5 (10.3)         | 73.1 (9.7)          | 66.7 (12.4)         | 0.013   |
| Renal disease, n (%)                    | 39 (15.7)       | 20 (30.8)              | 8 (12.7)            | 8 (13.1)            | 3 (5.1)             | 0.001   |
| Diabetes, n (%)                         | 52 (21.0)       | 18 (27.7)              | 13 (20.6)           | 11 (18.0)           | 10 (16.9)           | 0.180   |
| Prosthetic heart valve, n (%)           | 85 (34.4)       | 27 (41.5)              | 25 (40.3)           | 21 (34.4)           | 12 (20.3)           | 0.025   |
| Pacemaker, n (%)                        | 27 (10.9)       | 5 (7.7)                | 10 (15.9)           | 8 (13.1)            | 4 (6.8)             | 0.821   |
| Streptococcus spp., n (%)               | 119 (48.0)      | 26 (40.0)              | 31 (49.2)           | 33 (54.1)           | 29 (49.2)           | 0.302   |
| Staphylococcus aureus, n (%)            | 61 (24.6)       | 18 (27.7)              | 15 (23.8)           | 12 (19.7)           | 16 (27.1)           | 0.813   |
| Enterococcus faecalis, n (%)            | 62 (25.0)       | 19 (29.2)              | 17 (27.0)           | 17 (27.9)           | 9 (15.3)            | 0.149   |
| Coagulase-negative staphylococci, n (%) | 8 (3.2)         | 3 (4.6)                | 0 (0)               | 0 (0)               | 5 (8.5)             | 0.347   |
| Full IV AB-treatment, n (%)**           | 124 (50)        | 18 (43.1)              | 34 (54.0)           | 31 (50.8)           | 31 (52.5)           | 0.423   |
| C-reactive protein, mg/L – median (IQ)  | 13.0 (5.6–24.0) | 17.0 (8.0–31.0)        | 13.0 (6.6–26.5)     | 12.0 (5.0–23.0)     | 10.0 (4.3–18.5)     | 0.038   |

IV = Intra venous, AB = Antibiotic. \*Hgb in mmol/L; \*\*Non-intervention group in POET.

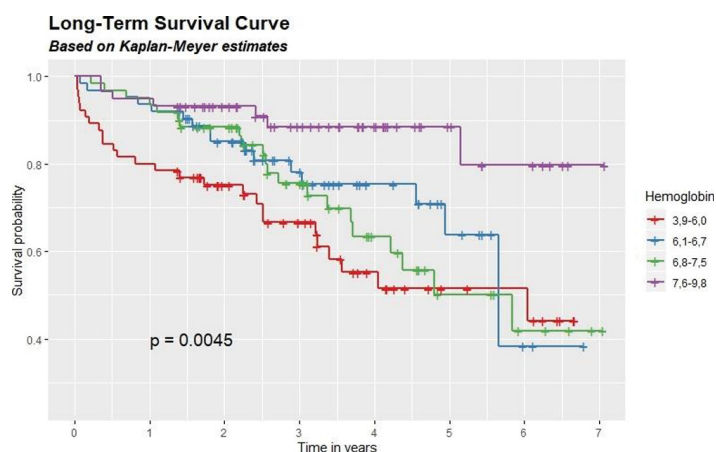

Source: http://academic.oup.com/eurheartj/article-pdf/41/Supplement_2/ehaa946.2018/34515196/ehaa946.2018.pdf
